# Supplementary material
Source: PubMed Central journal article supplement (PMC3512140)
Supplement: supp_112.144592_FigureS1.pdf [file supp_112.144592_FigureS1.pdf]

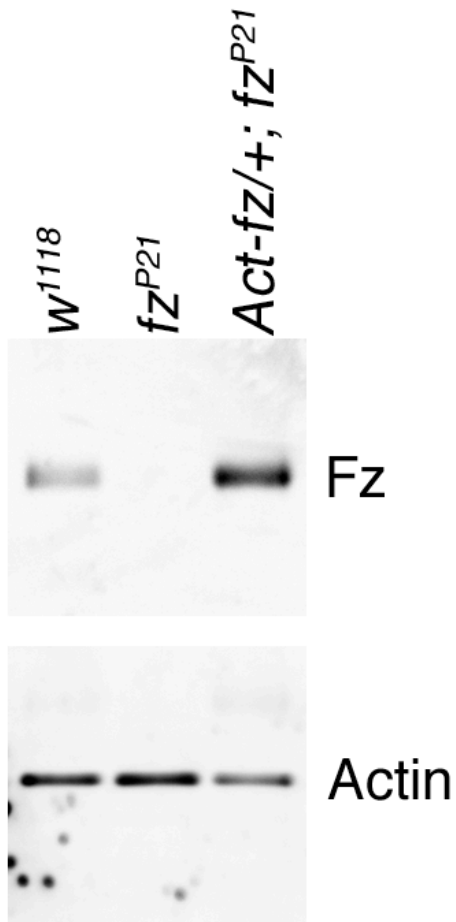

**Figure S1** Level of Fz expression from the *Act5C-fz* transgene. Western blot of 28 hr pupal wing extracts from  $w^{1118}$ ,  $fz^{P21}$  and  $w; Act5C-fz/+; fz^{P21}$  animals, probed for Fz protein (upper panel) or Actin (lower panel). One copy of the *Act5C-fz* transgene gives about five-fold higher expression of Fz than two copies of the endogenous gene as seen in the  $w^{1118}$  control strain.
