# Supplementary material
Source: PubMed Central journal article supplement (PMC3512140)
Supplement: supp_112.144592_TableS1.pdf [file supp_112.144592_TableS1.pdf]

**Table S1 Quantitative scoring of missense alleles**

| Amino acid change and Allele | Region of protein | Planar polarity phenotype (extra tarsal joints) | Canonical phenotype (wing margin): Category | Canonical phenotype (wing margin): Proportion of anterior wing margin notched | Canonical phenotype (wing margin): Proportion of anterior wing margin with yellow bristles |
|------------------------------|-------------------|-------------------------------------------------|---------------------------------------------|-------------------------------------------------------------------------------|--------------------------------------------------------------------------------------------|
| C53F                         | CRD               | 2.7                                             | Intermediate                                | 0.07                                                                          | 0.01                                                                                       |
| C53Y                         | CRD               | 3.5                                             | Strong                                      | 0.16                                                                          | 0.00                                                                                       |
| C107Y                        | CRD               | 2.9                                             | Strong                                      | 0.40                                                                          | 0.01                                                                                       |
| P112L                        | CRD               | 2.3                                             | Intermediate                                | 0.02                                                                          | 0.05                                                                                       |
| R274C                        | ICL1              | 1.6                                             | Rescued                                     | 0.00                                                                          | 0.37                                                                                       |
| R274H                        | ICL1              | 0.8                                             | Rescued                                     | 0.00                                                                          | 0.44                                                                                       |
| R274H                        | ICL1              | 1.1                                             | Rescued                                     | 0.00                                                                          | 0.52                                                                                       |
| P278L                        | ICL1              | 1.8                                             | Intermediate                                | 0.03                                                                          | 0.03                                                                                       |
| P278L                        | ICL1              | 2.3                                             | Intermediate                                | 0.08                                                                          | 0.03                                                                                       |
| P278S                        | ICL1              | 1                                               | Rescued                                     | 0.00                                                                          | 0.45                                                                                       |
| P278S                        | ICL1              | 1                                               | Rescued                                     | 0.00                                                                          | 0.38                                                                                       |
| E279K                        | ICL1              | 3.3                                             | Rescued                                     | 0.00                                                                          | 0.19                                                                                       |
| E373K                        | ICL2              | 1                                               | Rescued                                     | 0.00                                                                          | 0.29                                                                                       |
| E373K                        | ICL2              | 0.9                                             | Rescued                                     | 0.00                                                                          | 0.47                                                                                       |
| H383L                        | TM4               | 1.3                                             | Rescued                                     | 0.00                                                                          | 0.44                                                                                       |
| H383Y                        | TM4               | 1.7                                             | Rescued                                     | 0.00                                                                          | 0.45                                                                                       |
| P390L                        | TM4               | 2.4                                             | Intermediate                                | 0.02                                                                          | 0.03                                                                                       |
| P390L                        | TM4               | 2.3                                             | Intermediate                                | 0.06                                                                          | 0.02                                                                                       |
| G444R                        | TM5               | 1.9                                             | Strong                                      | 0.22                                                                          | 0.00                                                                                       |
| I451F                        | ICL3              | 2.1                                             | Rescued                                     | 0.00                                                                          | 0.47                                                                                       |
| M469K                        | ICL3              | 2.3                                             | Strong                                      | 0.16                                                                          | 0.00                                                                                       |
| M469T/G                      | ICL3/T            | 1                                               | Rescued                                     | 0.00                                                                          | 0.36                                                                                       |
| I472K                        | TM6               | 1.8                                             | Rescued                                     | 0.00                                                                          | 0.36                                                                                       |
| G545R                        | TM7               | 2.6                                             | Strong                                      | 0.25                                                                          | 0.00                                                                                       |
| Y553X                        | C-                | 2.3                                             | Intermediate                                | 0.05                                                                          | 0.04                                                                                       |
| S554F                        | C-                | 2.3                                             | Strong                                      | 0.19                                                                          | 0.03                                                                                       |
| W561X                        | C-                | 2.4                                             | Rescued                                     | 0.00                                                                          | 0.25                                                                                       |
| W561X                        | C-                | 2.2                                             | Rescued                                     | 0.00                                                                          | 0.24                                                                                       |
| W561X                        | C-                | 2.9                                             | Intermediate                                | 0.03                                                                          | 0.03                                                                                       |
| W561R                        | C-                | 2.1                                             | Rescued                                     | 0.00                                                                          | 0.22                                                                                       |
